# Supplementary material for: Label-Free Colorimetric Detection of Influenza Antigen Based on an Antibody-Polydiacetylene Conjugate and Its Coated Polyvinylidene Difluoride Membrane
Source: Polymers (Basel). 2017 Mar 30;9(4):127. doi: 10.3390/polym9040127 (PMC6432067; doi:10.3390/polym9040127)
Supplement: Supplementary file 1 [file polymers-09-00127-s001.pdf]

# Supplementary Materials: Label-Free Colorimetric Detection of Influenza Antigen Based on an Antibody-Polydiacetylene Conjugate and Its Coated Polyvinylidene Difluoride Membrane

Jae-pil Jeong, Eunae Cho, Taejoon Kim, Im-Soon Lee and Seunho Jung

## 1. NMR Spectroscopy

For the NMR spectroscopic analysis, a Bruker Avance 500 spectrometer (Bruker, Billerica, MA, USA) was used to record the  $^1\text{H}$  NMR spectrum.

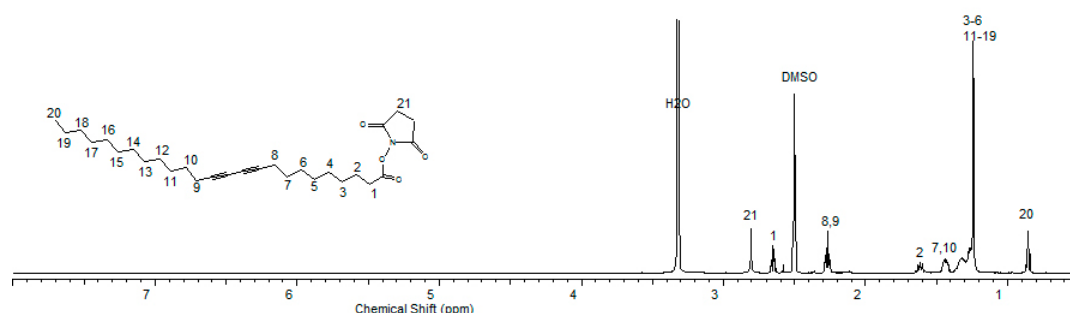

**Figure S1.**  $^1\text{H}$ -NMR spectrum (in  $\text{DMSO}-d_6$ ) of NHS-PCDA. NHS-PCDA.  $^1\text{H}$  NMR (500 MHz,  $\text{DMSO}-d_6$ ):  $\delta$  2.81(m, 4H, 21), 2.65 (t, 2H, 1), 2.27 (t, 4H, 8,9), 1.61 (t, 2H, 2), 1.48 (br, 4H, 7,10), 1.40–1.22 (br, 26H, 3–6,11–19), 0.85 (t, 3H, 20).

## Preparation of Unfunctionalized PDA Vesicles

The two lipid molecules were dissolved in chloroform at the desired molar ratios (PCDA 60%, DMPC 40%) for a total of 1 mM of lipid. Chloroform was removed by flowing  $\text{N}_2$  gas, and a thin lipid film was obtained on the glass surface. HEPES buffer solution (pH 8, 5 mM) was added to give a total lipid concentration of 1 mM. The samples were heated at 80  $^\circ\text{C}$  for 15 min. and sonicated for 12.5 min. using a probe sonicator (Sonics VC-505, Newtown, PA, USA) at 40% power. The warm solution was filtered through a 0.8  $\mu\text{m}$  cellulose acetate filter (Advantec, Tokyo, Japan) to remove any undispersed lipid, and the resulting milky solution was cooled to 4  $^\circ\text{C}$  overnight. After photopolymerization, the resulting PDA vesicles were used to compare with antibody conjugated PDA vesicles.

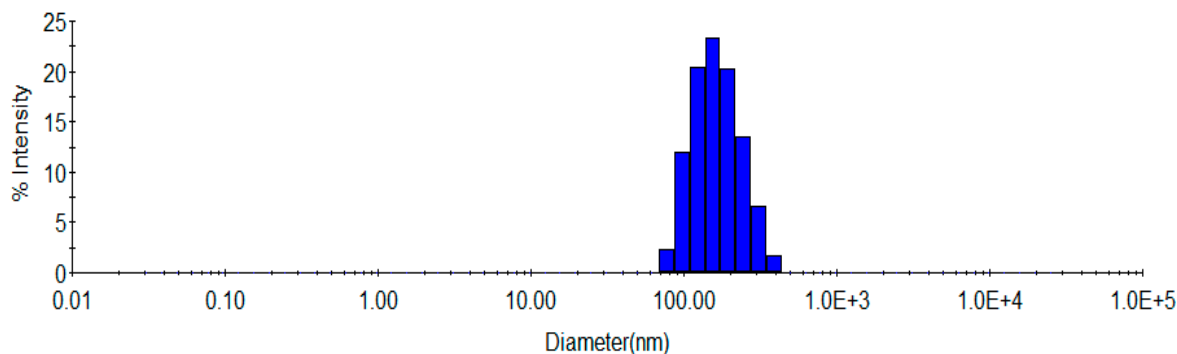

**Figure S2.** DLS profile of non-modified PDA nano-vesicles (average diameter = 175 nm).

## 2. Fourier-Transform Infrared (FT-IR) Spectroscopy

FT-IR spectra were obtained in ATR mode using a Nicolet iS50 spectrometer (Thermo Nicolet Instrument Corporation, Madison, WI, USA).

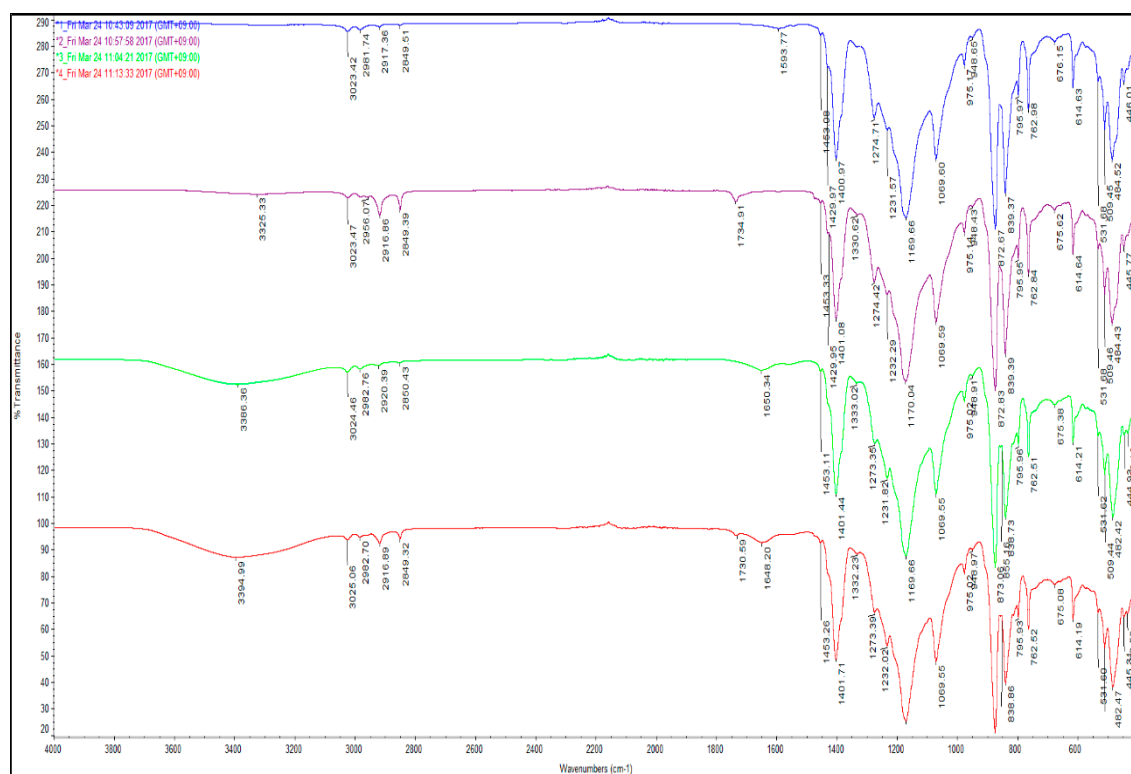

**Figure S3.** FT-IR spectra of the original PVDF (**blue line**), buffer-treated antibody-PDA coated PVDF (**purple line**), BSA-treated antibody-PDA coated PVDF (**green line**), and virus antigen-treated antibody-PDA coated PVDF (**red line**).

**Table S1.** FT-IR absorption bands of *N*-benzyltriazole derivatized dextran before and after adsorption.

| Original<br>PVDF | Wavenumber (cm <sup>-1</sup> )                |                                            |                                                           | Assignment                                                      |
|------------------|-----------------------------------------------|--------------------------------------------|-----------------------------------------------------------|-----------------------------------------------------------------|
|                  | Buffer-treated<br>antibody-PDA<br>coated PVDF | BSA-treated<br>antibody-PDA<br>coated PVDF | Virus antigen-<br>treated antibody-<br>PDA coated<br>PVDF |                                                                 |
|                  | 3325                                          | 3386                                       | 3395                                                      | O-H stretch                                                     |
| 3023             | 3023                                          | 3024                                       | 3025                                                      | Asymmetric CH <sub>2</sub> stretch                              |
| 2982             | 2956                                          | 2983                                       | 2983                                                      | Symmetric CH <sub>2</sub> stretch                               |
|                  | 1735                                          |                                            | 1731                                                      | Carboxylic acid C=O stretch                                     |
|                  |                                               | 1690                                       | 1648                                                      | Amide C=O stretch                                               |
| 1401             | 1402                                          | 1401                                       | 1402                                                      | CH <sub>2</sub> wagging,<br>C-C-C asymmetric stretch            |
| 1232             | 1232                                          | 1232                                       | 1232                                                      | C-F asymmetric stretch                                          |
| 1170             | 1170                                          | 1170                                       | 1170                                                      | C-C, CH <sub>2</sub> stretch                                    |
| 873              | 873                                           | 873                                        | 873                                                       | C-C-C asymmetric stretch, CF <sub>2</sub><br>asymmetric stretch |
| 839              | 839                                           | 839                                        | 839                                                       | CH <sub>2</sub> rocking,<br>CF <sub>2</sub> asymmetric stretch  |
